# Supplementary material for: Limited Stability of Microcystins in Oligopeptide Compositions of Microcystis aeruginosa (Cyanobacteria): Implications in the Definition of Chemotypes
Source: Toxins (Basel). 2013 Jun 6;5(6):1089–104. doi: 10.3390/toxins5061089 (PMC3717771; doi:10.3390/toxins5061089)
Supplement: Supplementary File 1 — Supplementary Information (PDF, 90 KB) [file toxins-05-01089-s001.pdf]

## Supplementary Information

**Table S1.** Results of ascending hierarchical clustering for nutrient treatments. N-deficient (NN) and P-deficient (NP) oligopeptide compositions were, respectively, compared to control conditions (NC). The assignment to each cluster is expressed as a percentage of treatment replicates. Different treatments are codified according to strain name, treatment applied and day of sampling (*i.e.*, 265 NC t10 corresponds to UAM265, control conditions, day 10). *n* stands for number of replicates analyzed in each case.

| Strain UAM254 |           |            |            | A             |           |             |            |
|---------------|-----------|------------|------------|---------------|-----------|-------------|------------|
| NN vs. NC     |           |            |            | NP vs. NC     |           |             |            |
| Treatment     | <i>n</i>  | Cluster A  | Cluster B  | Treatment     | <i>n</i>  | Cluster A   | Cluster B  |
| 254 N t0      | 19        | 95%        | 5%         | 254 N t0      | 19        | 100%        | 0%         |
| 254 NC t6     | 20        | 95%        | 5%         | 254 NC t6     | 20        | 100%        | 0%         |
| 254 NC t10    | 20        | 100%       | 0%         | 254 NC t10    | 20        | 100%        | 0%         |
| 254 NC t15    | 20        | 5%         | 95%        | 254 NC t15    | 20        | 20%         | 80%        |
| <b>254 NC</b> | <b>79</b> | <b>73%</b> | 27%        | <b>254 NC</b> | <b>79</b> | <b>80%</b>  | 20%        |
| 254 NN t6     | 20        | 15%        | 85%        | 254 NP t6     | 20        | 100%        | 0%         |
| 254 NN t10    | 20        | 5%         | 95%        | 254 NP t10    | 20        | 100%        | 0%         |
| 254 NN t15    | 20        | 0%         | 100%       | 254 NP t15    | 20        | 100%        | 0%         |
| <b>254 NN</b> | <b>60</b> | 7%         | <b>93%</b> | <b>254 NP</b> | <b>60</b> | <b>100%</b> | 0%         |
| Strain UAM264 |           |            |            | B             |           |             |            |
| NN vs. NC     |           |            |            | NP vs. NC     |           |             |            |
| Treatment     | <i>n</i>  | Cluster A  | Cluster B  | Treatment     | <i>n</i>  | Cluster A   | Cluster B  |
| 264 N t0      | 20        | 95%        | 5%         | 264 N t0      | 20        | 85%         | 15%        |
| 264 NC t6     | 20        | 100%       | 0%         | 264 NC t6     | 20        | 100%        | 0%         |
| 264 NC t10    | 20        | 100%       | 0%         | 264 NC t10    | 20        | 95%         | 5%         |
| 264 NC t15    | 20        | 100%       | 0%         | 264 NC t15    | 20        | 95%         | 5%         |
| <b>264 NC</b> | <b>80</b> | <b>99%</b> | 1%         | <b>264 NC</b> | <b>80</b> | <b>94%</b>  | 6%         |
| 264 NN t6     | 20        | 95%        | 5%         | 264 NP t6     | 19        | 95%         | 5%         |
| 264 NN t10    | 19        | 84%        | 16%        | 264 NP t10    | 20        | 75%         | 25%        |
| 264 NN t15    | 20        | 100%       | 0%         | 264 NP t15    | 21        | 100%        | 0%         |
| <b>264 NN</b> | <b>59</b> | <b>93%</b> | 7%         | <b>264 NP</b> | <b>60</b> | <b>90%</b>  | 10%        |
| Strain UAM265 |           |            |            | C             |           |             |            |
| NN vs. NC     |           |            |            | NP vs. NC     |           |             |            |
| Treatment     | <i>n</i>  | Cluster A  | Cluster B  | Treatment     | <i>n</i>  | Cluster A   | Cluster B  |
| 265 N t0      | 20        | 85%        | 15%        | 265 N t0      | 20        | 85%         | 15%        |
| 265 NC t6     | 20        | 65%        | 35%        | 265 NC t6     | 20        | 65%         | 35%        |
| 265 NC t10    | 18        | 50%        | 50%        | 265 NC t10    | 18        | 50%         | 50%        |
| 265 NC t15    | 20        | 95%        | 5%         | 265 NC t15    | 20        | 95%         | 5%         |
| 265 NC t20    | 19        | 42%        | 58%        | 265 NC t20    | 19        | 42%         | 58%        |
| <b>265 NC</b> | <b>97</b> | <b>68%</b> | 32%        | <b>265 NC</b> | <b>97</b> | <b>68%</b>  | 32%        |
| 265 NN t6     | 20        | 25%        | 75%        | 265 NP t6     | 20        | 45%         | 55%        |
| 265 NN t10    | 20        | 25%        | 75%        | 265 NP t10    | 20        | 50%         | 50%        |
| 265 NN t15    | 20        | 15%        | 85%        | 265 NP t15    | 20        | 40%         | 60%        |
| 265 NN t20    | 20        | 10%        | 90%        | 265 NP t20    | 20        | 5%          | 95%        |
| <b>265 NN</b> | <b>80</b> | 19%        | <b>81%</b> | <b>265 NP</b> | <b>80</b> | 35%         | <b>65%</b> |

**Table S2.** Results of ascending hierarchical clustering for light intensity treatments. One-hundred fifty micro-mole photons m<sup>-2</sup> s<sup>-1</sup> (LM) and 400 µmol photons m<sup>-2</sup> s<sup>-1</sup> (LS) oligopeptide compositions were, respectively, compared to low light (LL). The assignment to each cluster is expressed as a percentage of treatment replicates. Different treatments are codified according to strain name, treatment applied and day of sampling (*i.e.*, 265 LL t10 corresponds to UAM265, low light conditions (control), day 10). *n* stands for number of replicates analyzed in each case.

| <b>Strain UAM254</b> |            |            |            | <b>A</b>      |            |            |            |
|----------------------|------------|------------|------------|---------------|------------|------------|------------|
| LM vs. LL            |            |            |            | LH vs. LL     |            |            |            |
| Treatment            | <i>n</i>   | Cluster A  | Cluster B  | Treatment     | <i>n</i>   | Cluster A  | Cluster B  |
| 254 L t0             | 20         | 100%       | 0%         | 254 L t0      | 20         | 100%       | 0%         |
| 254 LL t6            | 20         | 100%       | 0%         | 254 LL t6     | 20         | 100%       | 0%         |
| 254 LL t10           | 18         | 89%        | 11%        | 254 LL t10    | 18         | 94%        | 6%         |
| 254 LL t15           | 19         | 95%        | 5%         | 254 LL t15    | 19         | 100%       | 0%         |
| 254 LL t20           | 19         | 84%        | 16%        | 254 LL t20    | 19         | 95%        | 5%         |
| 254 LL t40           | 20         | 80%        | 20%        | 254 LL t40    | 20         | 85%        | 15%        |
| <b>254 LL</b>        | <b>116</b> | <b>91%</b> | <b>9%</b>  | <b>254 LL</b> | <b>116</b> | <b>96%</b> | <b>4%</b>  |
| 254 LM t6            | 20         | 95%        | 5%         | 254 LH t6     | 20         | 95%        | 5%         |
| 254 LM t10           | 16         | 38%        | 63%        | 254 LH t10    | 19         | 79%        | 21%        |
| 254 LM t15           | 20         | 0%         | 100%       | 254 LH t15    | 20         | 0%         | 100%       |
| 254 LM t20           | 20         | 0%         | 100%       | 254 LH t20    | 20         | 0%         | 100%       |
| <b>254 LM</b>        | <b>76</b>  | <b>33%</b> | <b>67%</b> | <b>254 LH</b> | <b>79</b>  | <b>43%</b> | <b>57%</b> |

  

| <b>Strain UAM264</b> |            |            |            | <b>B</b>      |            |            |            |
|----------------------|------------|------------|------------|---------------|------------|------------|------------|
| LM vs. LL            |            |            |            | LH vs. LL     |            |            |            |
| Treatment            | <i>n</i>   | Cluster A  | Cluster B  | Treatment     | <i>n</i>   | Cluster A  | Cluster B  |
| 264 L t0             | 19         | 79%        | 21%        | 264 L t0      | 19         | 79%        | 21%        |
| 264 LL t6            | 20         | 90%        | 10%        | 264 LL t6     | 20         | 90%        | 10%        |
| 264 LL t10           | 20         | 75%        | 25%        | 264 LL t10    | 20         | 75%        | 25%        |
| 264 LL t15           | 19         | 37%        | 63%        | 264 LL t15    | 19         | 37%        | 63%        |
| 264 LL t20           | 19         | 84%        | 16%        | 264 LL t20    | 19         | 84%        | 16%        |
| 264 LL t40           | 20         | 80%        | 20%        | 264 LL t40    | 20         | 80%        | 20%        |
| <b>264 LL</b>        | <b>117</b> | <b>73%</b> | <b>27%</b> | <b>264 LL</b> | <b>117</b> | <b>75%</b> | <b>25%</b> |
| 264 LM t6            | 19         | 63%        | 37%        | 264 LH t6     | <b>20</b>  | 30%        | 70%        |
| 264 LM t10           | 20         | 70%        | 30%        | 264 LH t10    | <b>20</b>  | 35%        | 65%        |
| 264 LM t15           | 20         | 10%        | 90%        | 264 LH t15    | <b>20</b>  | 15%        | 85%        |
| 264 LM t20           | 20         | 45%        | 55%        | 264 LH t20    | <b>20</b>  | 15%        | 85%        |
| <b>264 LM</b>        | <b>79</b>  | <b>47%</b> | <b>53%</b> | <b>264 LH</b> | <b>80</b>  | <b>24%</b> | <b>76%</b> |

Table S2. Cont.

| Strain UAM265 |            | C          |            |
|---------------|------------|------------|------------|
| LM vs. LL     |            |            |            |
| Treatment     | <i>n</i>   | Cluster A  | Cluster B  |
| 265 L t0      | 19         | 89%        | 11%        |
| 265 LL t6     | 20         | 60%        | 40%        |
| 265 LL t10    | 20         | 25%        | 75%        |
| 265 LL t15    | 20         | 80%        | 20%        |
| 265 LL t20    | 20         | 95%        | 5%         |
| 265 LL t40    | 20         | 35%        | 65%        |
| <b>265 LL</b> | <b>119</b> | <b>65%</b> | <b>35%</b> |
|               |            |            |            |
| 265 LM t6     | 20         | 70%        | 30%        |
| 265 LM t10    | 20         | 15%        | 85%        |
| 265 LM t15    | 20         | 0%         | 100%       |
| 265 LM t20    | 20         | 30%        | 70%        |
| <b>265 LM</b> | <b>80</b>  | <b>29%</b> | <b>71%</b> |

© 2013 by the authors; licensee MDPI, Basel, Switzerland. This article is an open access article distributed under the terms and conditions of the Creative Commons Attribution license (<http://creativecommons.org/licenses/by/3.0/>).
